# Supplementary material for: Pharmacologic reversion of epigenetic silencing of the PRKD1 promoter blocks breast tumor cell invasion and metastasis
Source: PubMed Central journal article supplement (PMC4052945; doi:10.1186/bcr3460), 2013-08-23
Supplement: bcr3460-S1.pdf [file bcr3460-S1.pdf]

**Table S1**

| Cell line  | <i>PRKD1</i> methylation | PKD1 expression | Tumorigenicity | <i>in vitro</i> Invasiveness | Metastasis <i>in vivo</i> | ER | PR | EGFR | HER2 |
|------------|--------------------------|-----------------|----------------|------------------------------|---------------------------|----|----|------|------|
| MCF-10A    | N                        | ++              | N              | N                            | N                         | -  | -  | +    | +    |
| BT-474     | N                        | +++             | Y + E2 pellet  | P, low                       | N                         | -  | +  | +    | +    |
| ZR-75-1    | N                        | +               | Y + E2 pellet  | P, low                       | N                         | +  | +  | +    | +    |
| MCF-7      | N                        | ++              | Y + E2 pellet  | N                            | N                         | +  | -  | +    | -    |
| T47D       | P                        | N               | Y + E2 pellet  | P                            | N                         | +  | +  | +    | -    |
| MDA-MB-231 | P                        | N               | Y              | P, high                      | Y                         | -  | -  | +    | -    |
| MDA-MB-468 | P                        | N               | Y              | P                            | Y                         | -  | -  | +    | -    |
| BT-20      | P                        | N               | Y              | P                            | N                         | -  | -  | +    | -    |

N = Negative, P = Positive (expressed), Y = Yes, + = low, ++ = medium, +++ = high, - = absent

**Table S1:** Correlation between *PRKD1* promoter methylation status, PKD1 expression and breast cancer cell line characteristics.
