# Supplementary material for: Pharmacologic reversion of epigenetic silencing of the PRKD1 promoter blocks breast tumor cell invasion and metastasis
Source: PubMed Central journal article supplement (PMC4052945; doi:10.1186/bcr3460), 2013-08-23
Supplement: bcr3460-S3.pdf [file bcr3460-S3.pdf]

**Figure S3**

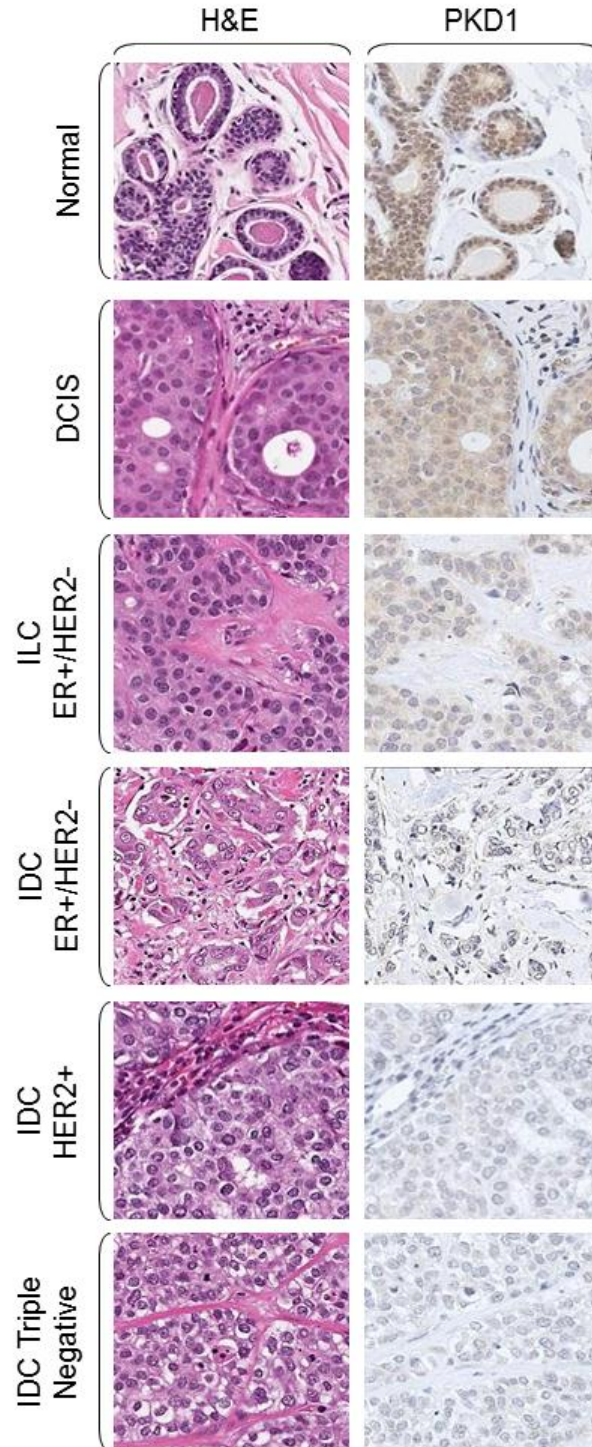

**Figure S3: PKD1 expression and activity in human breast cancer and normal human breast tissue.** Tissue microarray slides containing histologically-confirmed human breast cancer and normal breast tissue samples were analyzed for PKD1 expression using an isoform-specific antibody. Representative pictures of normal, DCIS, ILC, IDC and Triple Negative breast tumor tissue are depicted.
