# Supplementary material for: Pharmacologic reversion of epigenetic silencing of the PRKD1 promoter blocks breast tumor cell invasion and metastasis
Source: PubMed Central journal article supplement (PMC4052945; doi:10.1186/bcr3460), 2013-08-23
Supplement: bcr3460-S4.pdf [file bcr3460-S4.pdf]

**Figure S4**

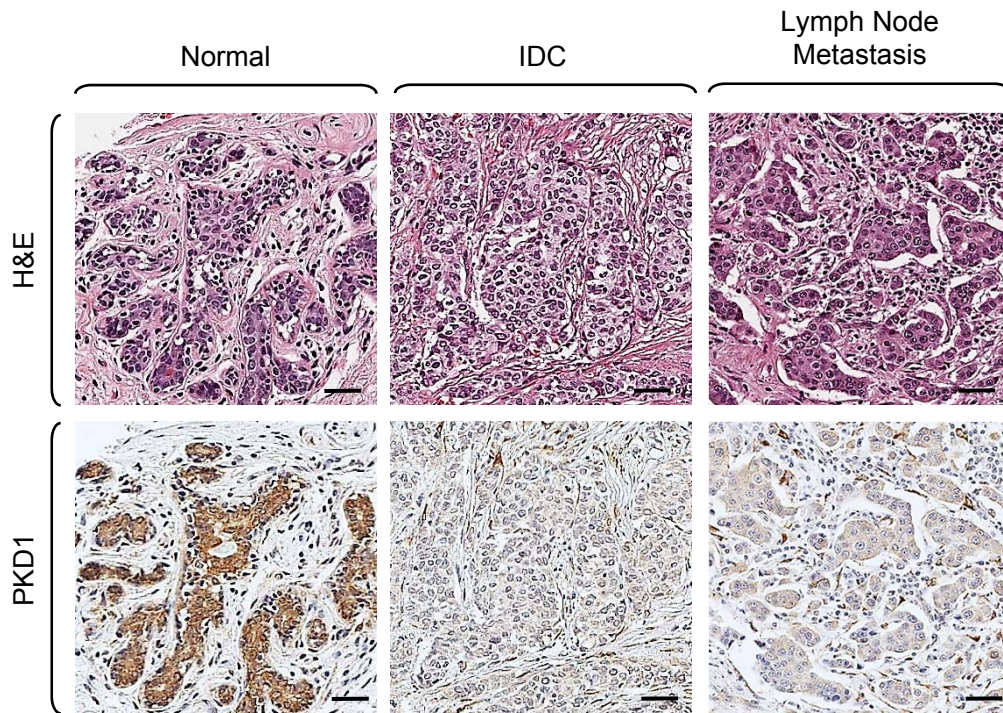

**Figure S4: PKD1 expression in human IDC and metastasis from lymph nodes.** Tissue microarray slides containing histologically-confirmed matching human invasive ductal carcinoma (IDC), lymph node metastasis and normal human breast tissue samples were analyzed for PKD1 expression using an isoform-specific antibody. Representative pictures of normal, IDC and lymph node metastasis tissues are depicted.
