# Supplementary material for: Pharmacologic reversion of epigenetic silencing of the PRKD1 promoter blocks breast tumor cell invasion and metastasis
Source: PubMed Central journal article supplement (PMC4052945; doi:10.1186/bcr3460), 2013-08-23
Supplement: bcr3460-S5.pdf [file bcr3460-S5.pdf]

**Figure S5**

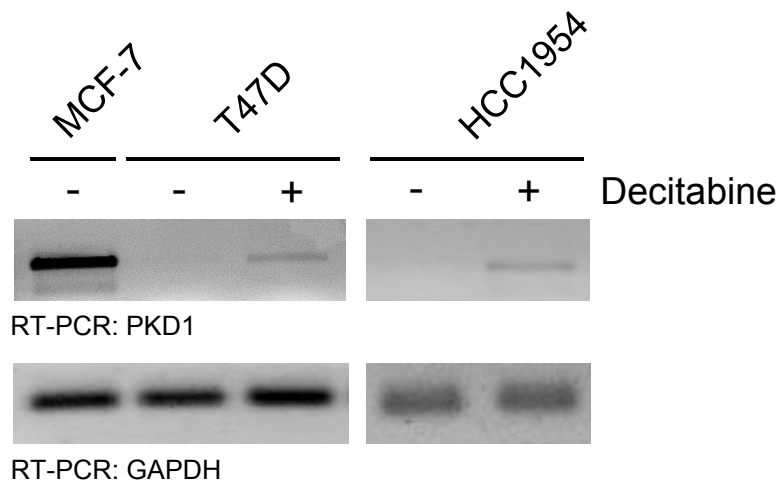

**Figure S5: Decitabine induced re-expression in T47D and HCC1954 breast cancer cell lines.** Cells were treated with decitabine (10  $\mu$ M) or control as indicated for 3 days. RNA was isolated and RT-PCR using specific primers for PKD1 and GAPDH was performed.
