# Supplementary material for: Pharmacologic reversion of epigenetic silencing of the PRKD1 promoter blocks breast tumor cell invasion and metastasis
Source: PubMed Central journal article supplement (PMC4052945; doi:10.1186/bcr3460), 2013-08-23
Supplement: bcr3460-S6.pdf [file bcr3460-S6.pdf]

**Figure S6**

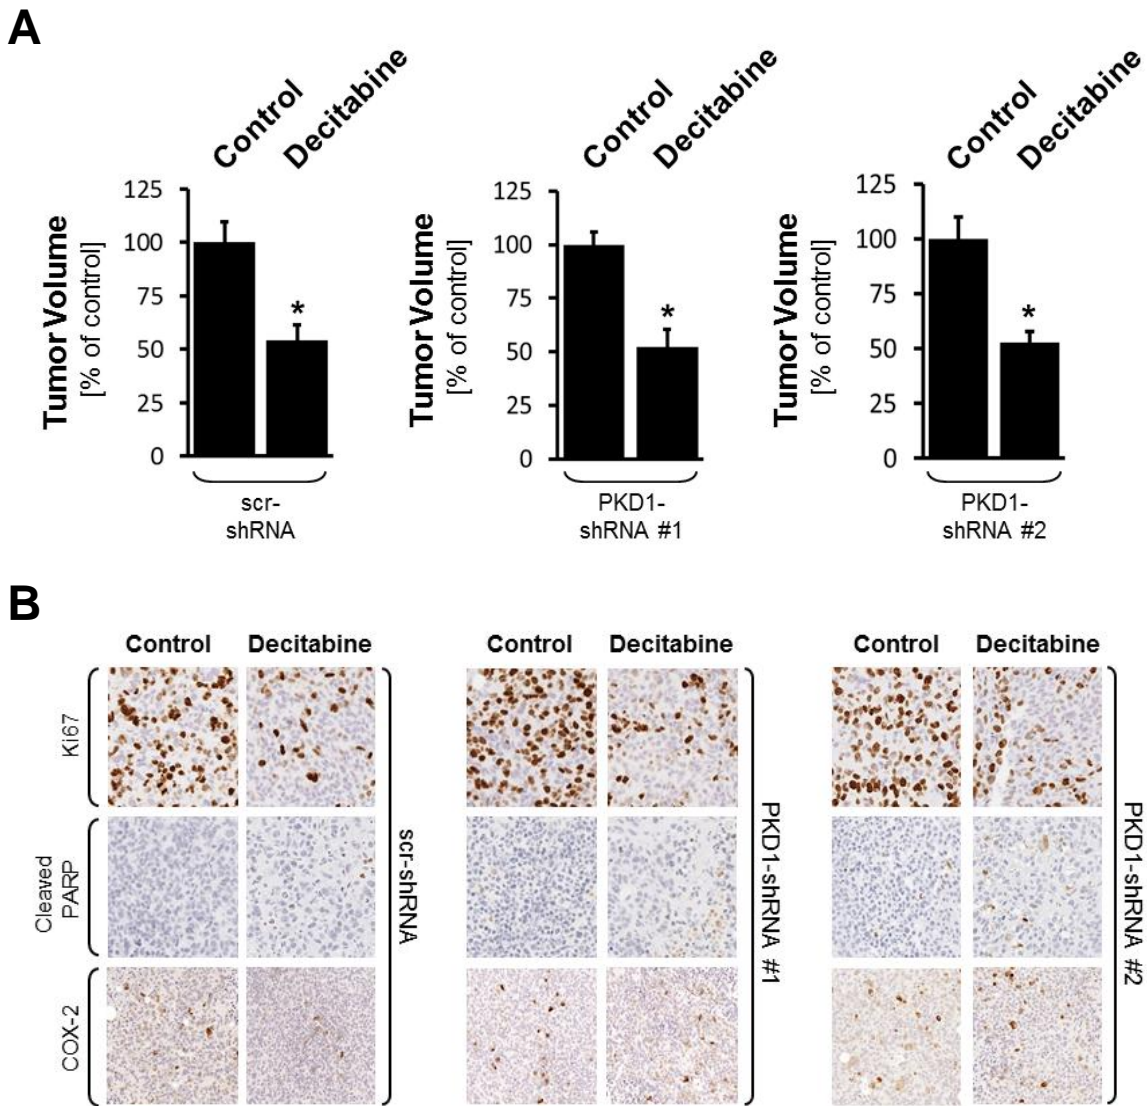

**Figure S6: PKD1-independent effects of decitabine treatment on primary tumor growth.** **A:** Volume of primary orthotopic mfp tumors obtained with MDA-MB-231 cells stably expressing control shRNA (scr-shRNA), PKD1-shRNA #1 or PKD1-shRNA #2 after control treatment (saline) or treatment with Decitabine (as indicated in Fig. 4A). Volume was determined with caliper measurement and is shown as % of control. \* indicates  $p \leq 0.005$ . **B:** IHC analysis of above primary orthotopic mfp tumors for the expression of Ki67, cleaved PARP and COX-2. Representative pictures of primary tumors are depicted.
